# Supplementary material for: Absence of Maternal Methylation in Biparental Hydatidiform Moles from Women with NLRP7 Maternal-Effect Mutations Reveals Widespread Placenta-Specific Imprinting
Source: PubMed Central journal article supplement (PMC4636177; doi:10.1371/journal.pgen.1005644), 2015-11-06

**S5\_Fig**

*TTC39A/EPS15*

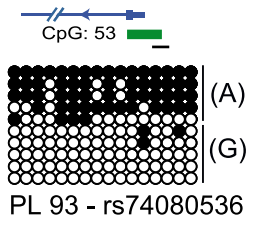

*THAP3*

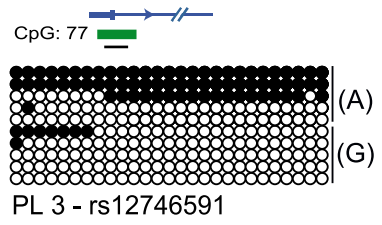

*EGR4*

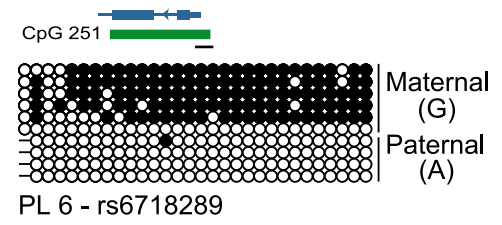

*RPN1*

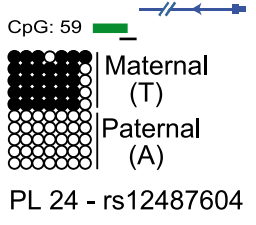

*RHOBTB3*

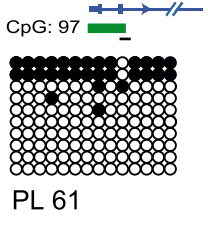

*PURA*

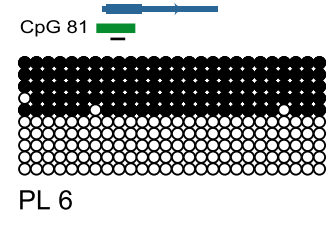

*SNCB*

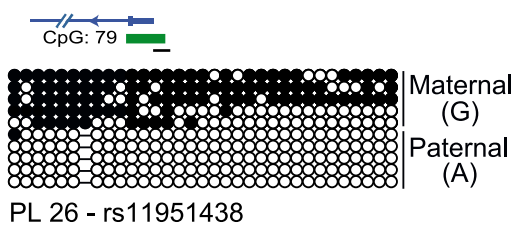

*THSD7A*

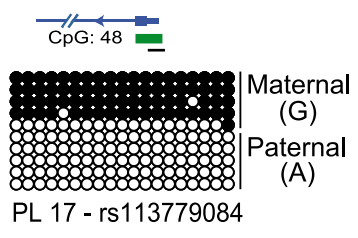

*CCDC71L*

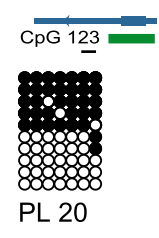

*ARMC3*

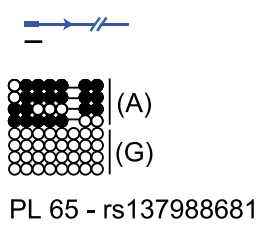

*AIFM2*

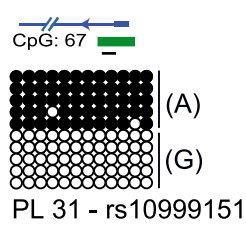

*FGF8*

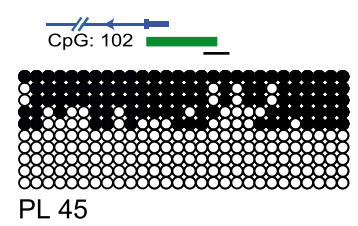

*CYB5R2*

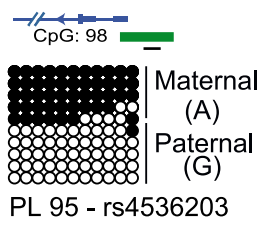

*RNF141*

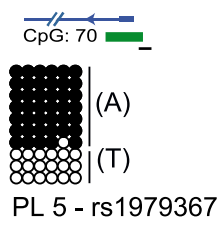

*WIF1*

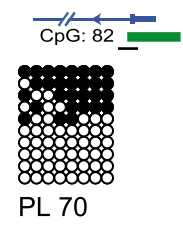

*RASGRF1*

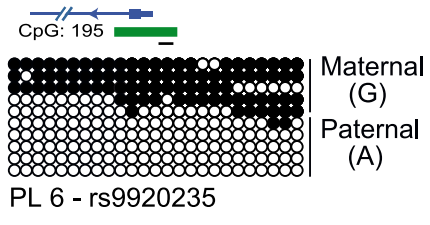

*SIAH1*

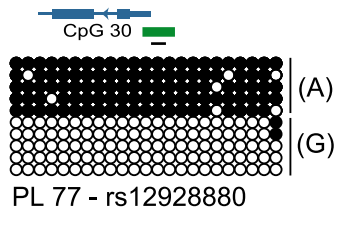

Supplement: pgen.1005644.s005.pdf [file pgen.1005644.s005.pdf]
