# Supplementary material for: Absence of Maternal Methylation in Biparental Hydatidiform Moles from Women with NLRP7 Maternal-Effect Mutations Reveals Widespread Placenta-Specific Imprinting
Source: PubMed Central journal article supplement (PMC4636177; doi:10.1371/journal.pgen.1005644), 2015-11-06

**S1\_Fig**

**A**

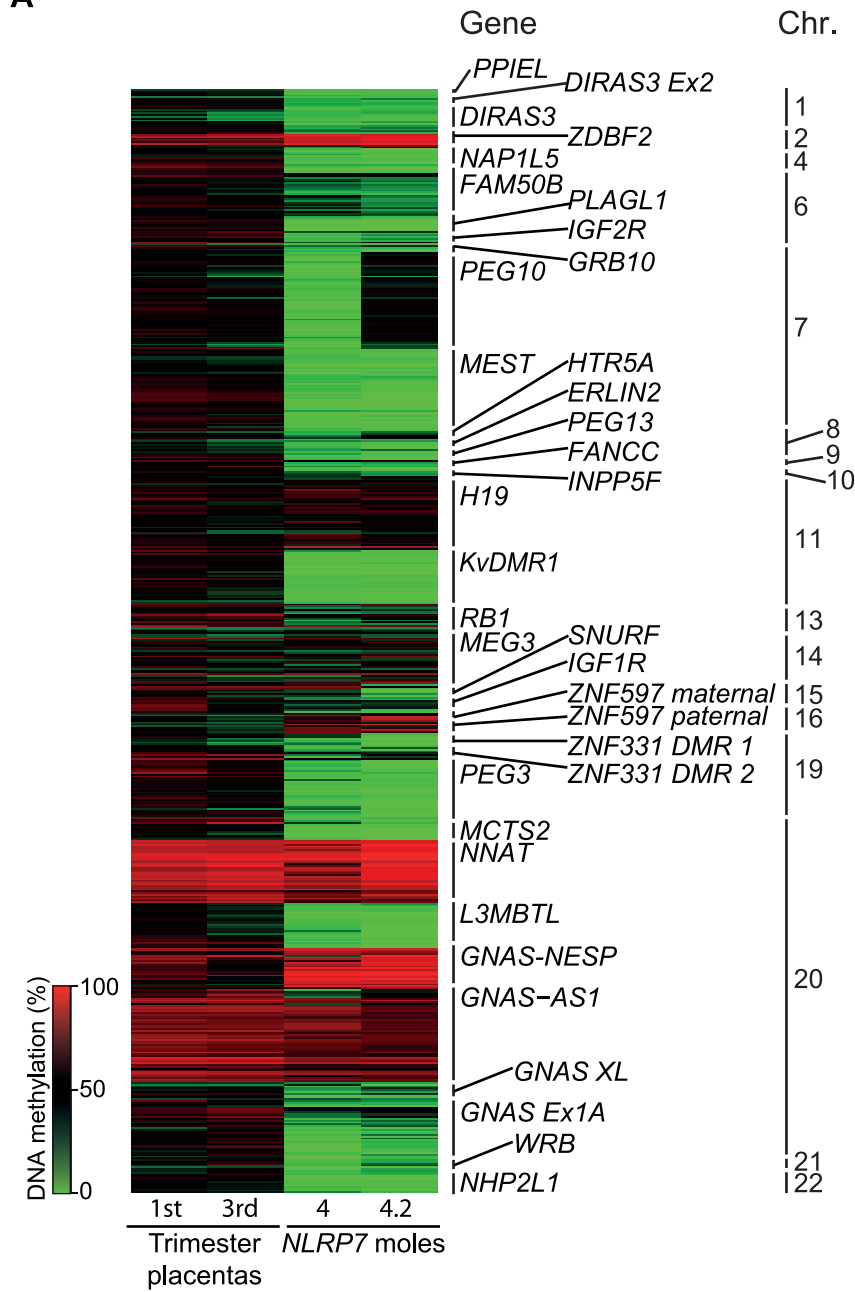

**B**

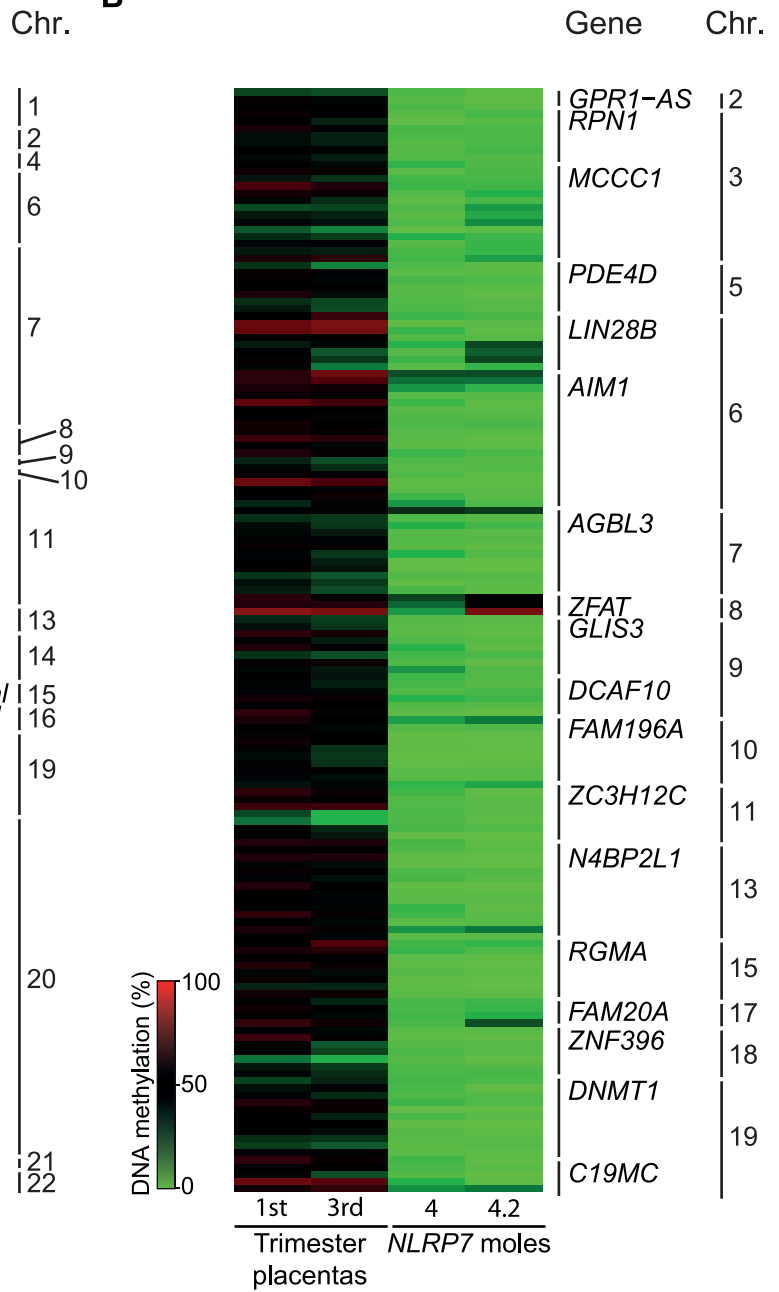

**C**

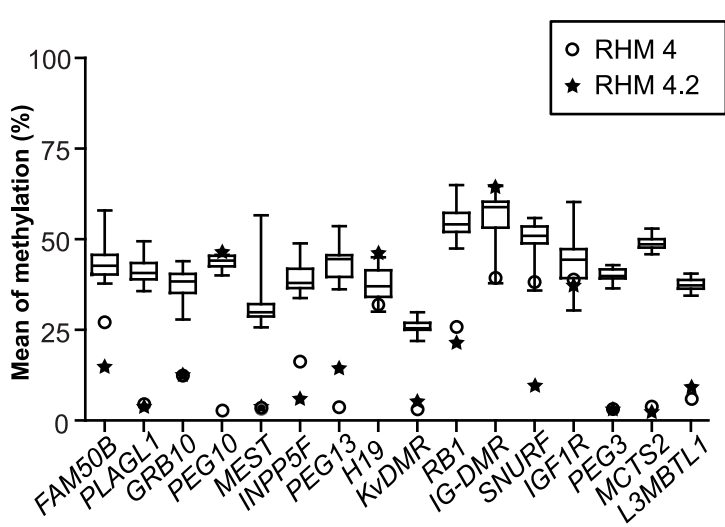

**D**

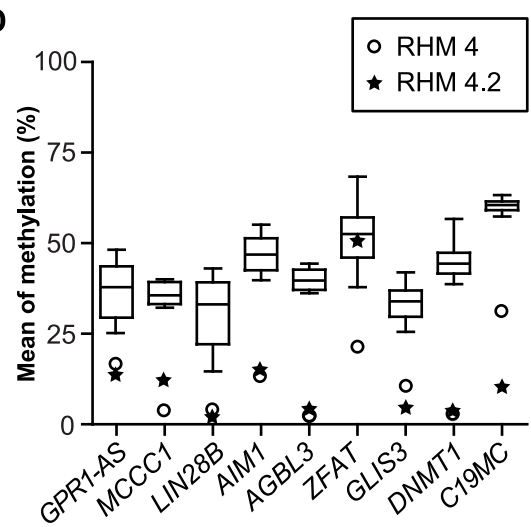

**E**

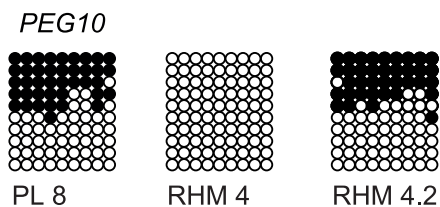

Supplement: pgen.1005644.s001.pdf [file pgen.1005644.s001.pdf]
