# Supplementary material for: Absence of Maternal Methylation in Biparental Hydatidiform Moles from Women with NLRP7 Maternal-Effect Mutations Reveals Widespread Placenta-Specific Imprinting
Source: PubMed Central journal article supplement (PMC4636177; doi:10.1371/journal.pgen.1005644), 2015-11-06

# S6\_Fig

**A**

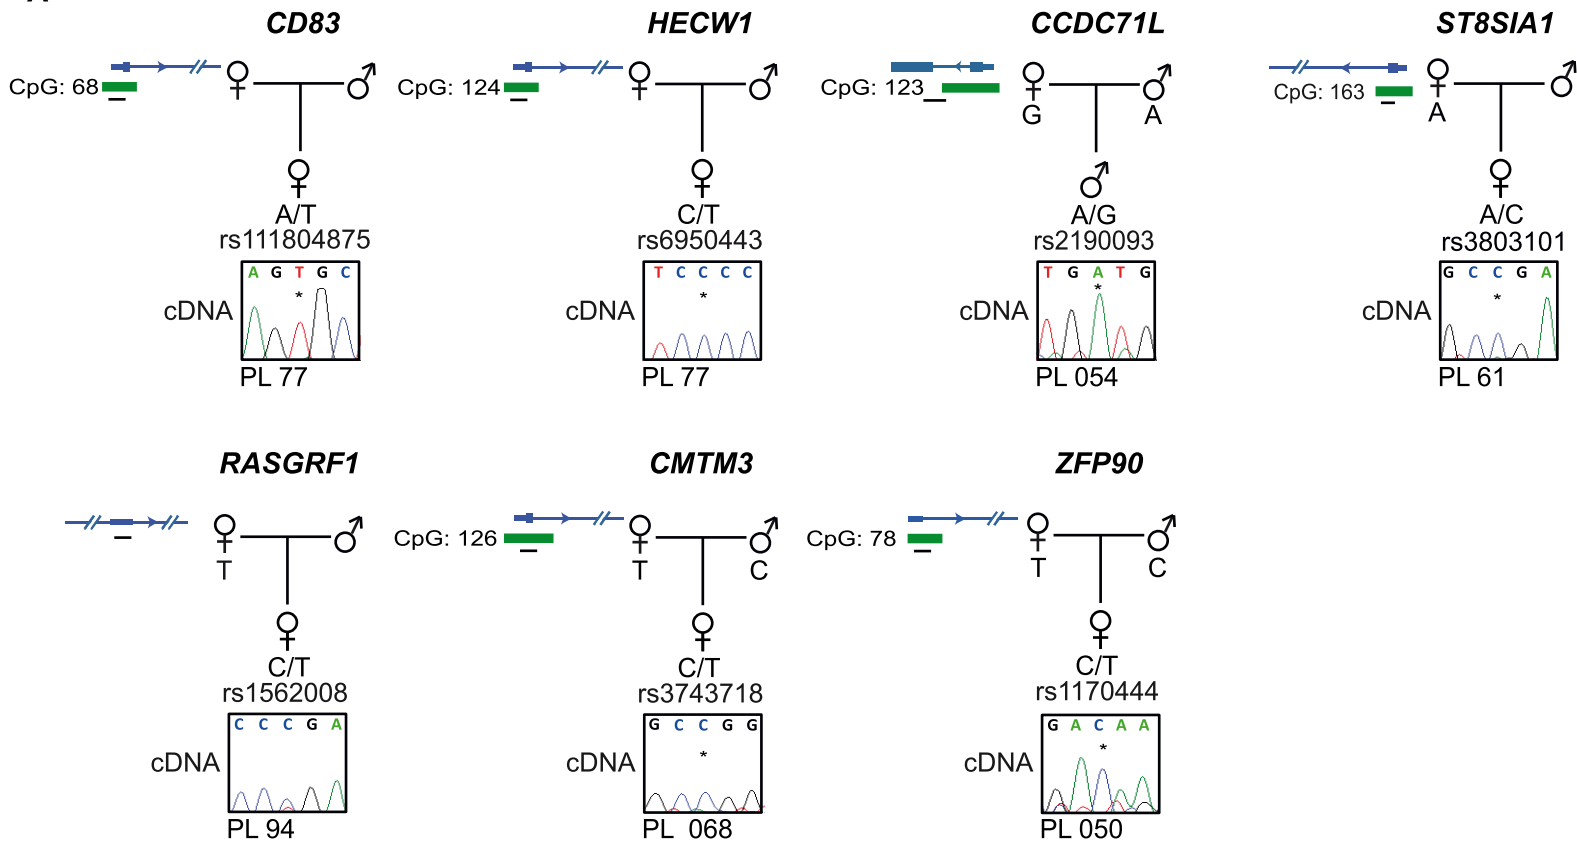

**B**

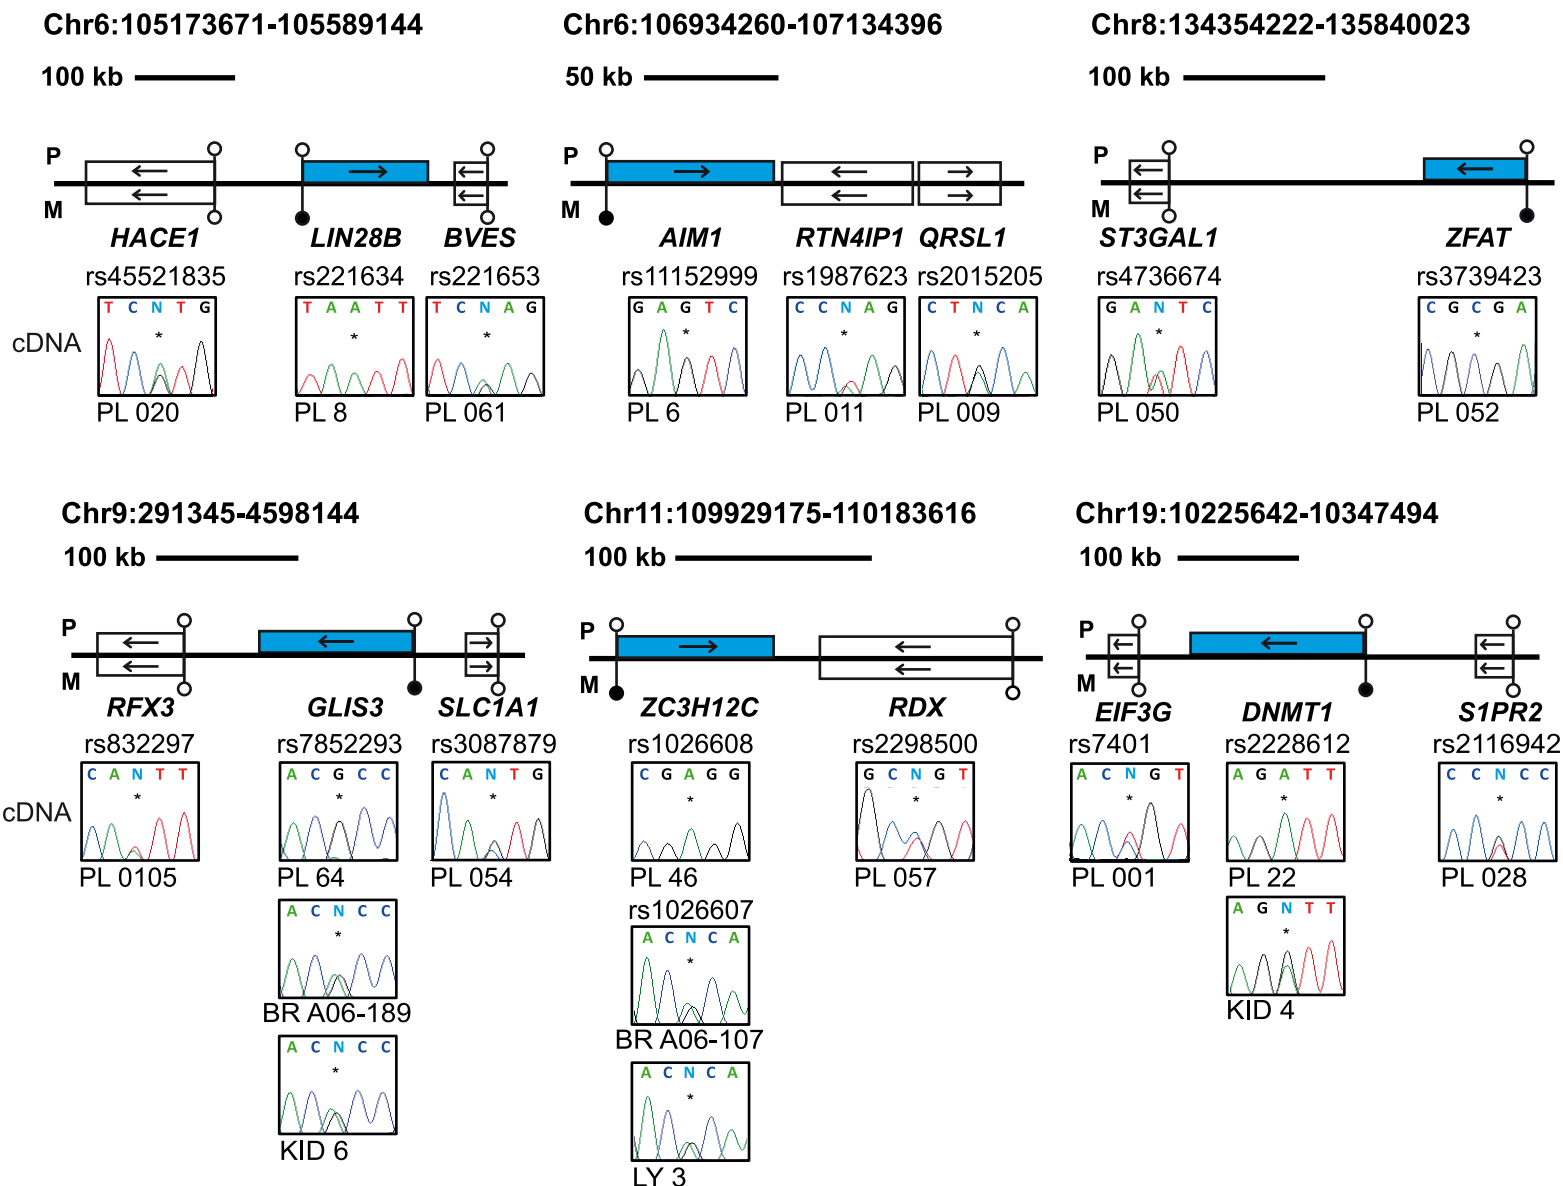

Supplement: pgen.1005644.s006.pdf [file pgen.1005644.s006.pdf]
